# Supplementary material for: Mechanical properties and superconductivity in two-dimensional B2O under extreme strain
Source: Royal Society of Chemistry journal article supplement (doi:10.1039/c9cp04826j), 2019-01-01
Supplement: c9cp04826j1.pdf [file c9cp04826j1.pdf]

Supporting Information

Mechanical Properties and Superconductivity in Two-Dimensional B<sub>2</sub>O  
under Extreme Strain

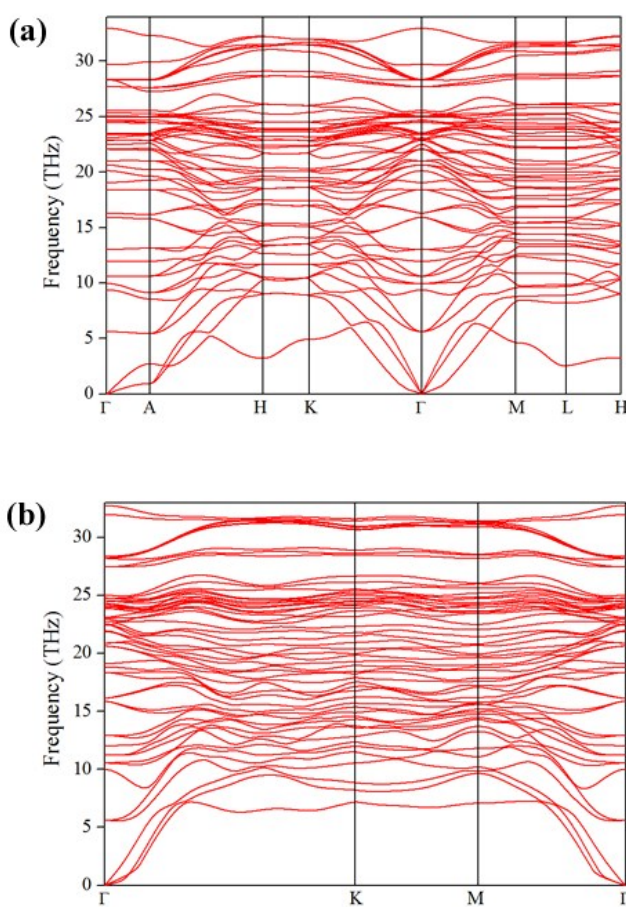

8

9 Figure: The phonon dispersion curves for (a) bulk and (b) monolayer B<sub>2</sub>O at ambient pressure.
